# Supplementary material
Source: MDPI journal article supplement (https://www.mdpi.com/2227-9040/11/9/480)
Supplement: s1 [file s1 › chemosensors-2506897-supplementary.pdf]

## Supplementary Materials

# Electrochemical Etching-Assisted Fabrication of Quantum Tunneling Sensing Probes with Controlled Nanogap Width

Bangrui Shao <sup>1,†</sup>, Qiuxiang He <sup>1,†</sup>, Tao Jiang <sup>1</sup>, Biaofeng Zeng <sup>1</sup>, Cuifang Kuang <sup>1</sup>, Xu Liu <sup>1</sup> and Longhua Tang <sup>1,2,\*</sup>

<sup>1</sup> State Key Laboratory of Modern Optical Instrumentation, College of Optical Science and Engineering, Zhejiang University, Hangzhou 310027, China

<sup>2</sup> Institute of Quantum Sensing, Interdisciplinary Centre for Quantum Information, Zhejiang University, Hangzhou 310027, China

\* Correspondence: lhtang@zju.edu.cn

† These authors contributed equally to this work.

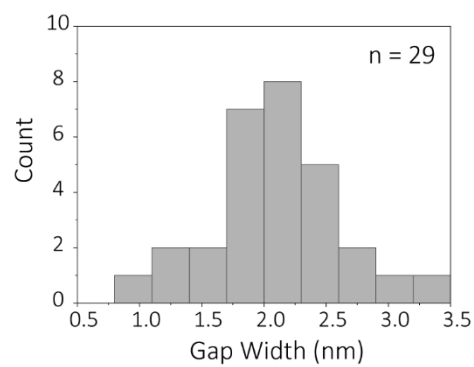

**Figure S1.** Histogram of gap width distribution for etched-tunneling electrodes.

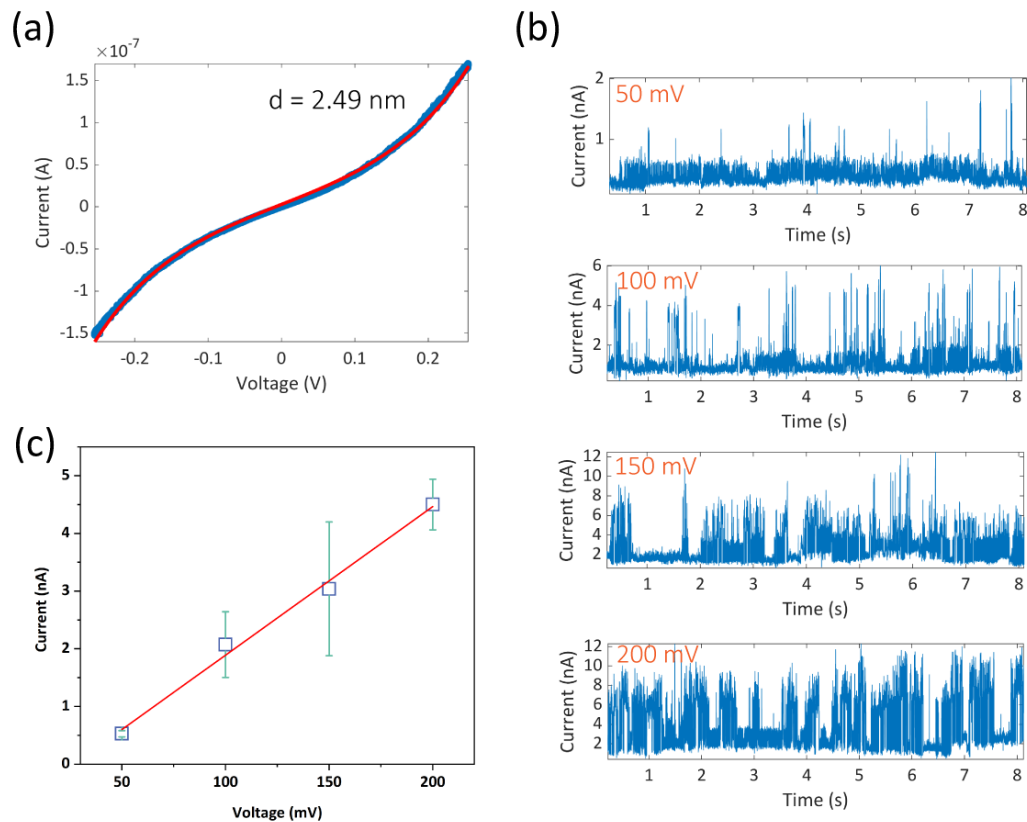

**Figure S2.** Tunneling current measurement of GOD under different bias voltage. (a) Tunneling current measurement of the used tunneling electrode and corresponding fit obtained by Simons model. (b) Representative tunneling current-time trace under different bias voltage for 10 nmol/L GOD in 0.01 mol/L PBS solution (pH 7.4). (c) Plots of peak current versus bias voltage for data presented in (b). All error bars represent 1 standard deviation from the mean.
